# Supplementary material for: Quality of Life and Life Satisfaction in Former Athletes: A Systematic Review and Meta-Analysis
Source: Springer Nature journal article supplement (doi:10.1007/s40279-019-01163-0), 2019-08-19
Supplement: MOESM2 [file 17082820]

## Electronic Supplementary File 2. Modified Downs and Black Criteria for Quality Appraisal

**Article title:** Quality of life and life satisfaction in former athletes: a systematic review and meta-analysis

**Authors:** Stephanie Filbay\*, Tej Pandya, Bryn Thomas, Carly McKay, Jo Adams, Nigel Arden

**\*Corresponding author details:** Centre for Sport, Exercise and Osteoarthritis Research Versus Arthritis; Nuffield Department of Orthopaedics, Rheumatology and Musculoskeletal Sciences, University of Oxford, Oxford, United Kingdom. Email: stephanie.filbay@uq.net.au

Scoring: YES = (1); NO = (0) Unable to determine: UTD = (0)

| CRITERIA                                                                                                      | EXPLANATION/ INTERPRETATION                                                                                                                                                                                                                                                                                                                          |
|---------------------------------------------------------------------------------------------------------------|------------------------------------------------------------------------------------------------------------------------------------------------------------------------------------------------------------------------------------------------------------------------------------------------------------------------------------------------------|
| 1. Is the hypothesis/aim/objective of the study clearly described?                                            | Must be explicit                                                                                                                                                                                                                                                                                                                                     |
| 2. Are the main outcomes to be measured clearly described in the introduction or methods section?             | <b>NO</b> = If a main outcome is first mentioned in the results section<br><b>YES</b> = if all primary outcomes are described in methods or introduction (i.e. reproducible).                                                                                                                                                                        |
| 3. Are the characteristics of the participants included in the study clearly described?                       | <b>YES</b> = if clear inclusion and/or exclusion criteria given.                                                                                                                                                                                                                                                                                     |
| 4. Are the distributions of principal confounders in each group of subjects to be compared clearly described? | <b>YES</b> = if age, gender and one or more confounder is described.                                                                                                                                                                                                                                                                                 |
| 5. Are the main findings of the study clearly described?                                                      | <b>YES</b> = All major findings clearly described so that the reader can check the major analyses and conclusions. Simple outcome data (including denominators, numerators) should be reported for all major findings.<br><b>NO</b> = If only percentages or only p values are reported for main findings.                                           |
| 6. Does the study provide estimates of the random variability in the data for the main outcomes?              | For non-normally distributed data the inter-quartile range of results should be reported. In normally distributed data the standard error, standard deviation or confidence intervals should be reported.<br><b>YES</b> = (mean + SD/SE/CI) OR (median + range/IQR).<br><b>NO</b> = mean + range/IQR OR if variability not reported.                 |
| 7. Have the characteristics of patients lost to follow-up (or non-responders) been described?                 | <b>For studies including follow-up:</b><br><b>YES</b> = if no patients lost to follow-up; <b>or</b> <5% loss to follow-up; <b>or</b> tells us something about those lost to follow-up (such as age, gender, that they did not differ from the rest of the cohort etc.). Note, stating the reasons why they were lost to follow-up is not sufficient. |

|                                                                                                                                                             |                                                                                                                                                                                                                                                                                                                                                                                                                                                                                                                                                                                                                                             |
|-------------------------------------------------------------------------------------------------------------------------------------------------------------|---------------------------------------------------------------------------------------------------------------------------------------------------------------------------------------------------------------------------------------------------------------------------------------------------------------------------------------------------------------------------------------------------------------------------------------------------------------------------------------------------------------------------------------------------------------------------------------------------------------------------------------------|
|                                                                                                                                                             | <p><b>NO</b> = if not explicitly stated how many lost to follow-up <b>or</b> does not say anything about the characteristics of those lost to follow-up.</p> <p><b>For cross-sectional studies:</b><br/> <b>YES</b> = if response rate &gt;80%; <b>or</b> tells us something about non-responders (such as age, gender, that they did not differ from the rest of the cohort etc.). Note, stating the reasons why they did not respond is not sufficient.<br/> <b>NO</b> = if response rate &lt;80% <b>and</b> does not explicitly state response rate <b>and</b> does not say anything about the characteristics of the non-responders</p> |
| 8. Have actual probability values been reported (e.g. 0.035 rather than <0.05) for the main outcomes except where the probability value is less than 0.001? | Additional explanation not necessary.                                                                                                                                                                                                                                                                                                                                                                                                                                                                                                                                                                                                       |
| 9. Were the subjects asked to participate in the study representative of the entire population from which they were recruited?                              | <p><b>YES</b> = if the source of the population <b>and</b> how they were selected is stated; <b>or</b> if stated that <u>all</u> of a population were selected; <b>or</b> an unselected sample of consecutive patients were selected; <b>or</b> a random sample from an entire population were selected.<br/> <b>UTD</b> = If the study does not state what proportion that sample was from the source population.<br/> <b>NO</b> = if unable to answer yes to any of the above criteria set for YES or UTD.</p>                                                                                                                            |
| 10. Were those subjects who were prepared to participate representative of the entire population from which they were recruited?                            | <p><b>YES</b> = if the study reports how many agreed to participate <b>and</b> compares one or more confounder with those agreeing and those not agreeing to participate (ie, that they did not differ from the source population, or mean age, or gender etc.) <b>OR YES</b> = if all of a population were selected.<br/> <b>UTD</b> = if they did not state how many agreed to participate from the source population, or if they did not compare those agreeing with those not agreeing to participate.<br/> <b>NO</b> = if significant difference was reported in sample compared to population.</p>                                    |
| 11. Was the sample appropriately described with regards to sport-related characteristics?                                                                   | <b>YES</b> = if the type and standard of previous sport participation (professional, college, or recreational) is described <b>and</b> either the length of career <b>or</b> age at retirement is described                                                                                                                                                                                                                                                                                                                                                                                                                                 |
| 12. Were the main outcome measures used accurate (valid and reliable)?                                                                                      | <p><b>YES</b> = If QOL measures are clearly described, <b>and</b> references other article(s) which found outcome measure to be valid and reliable, <b>or</b> demonstrates the outcome measure(s) are valid and reliable (note all primary outcomes must be valid and reliable for YES).<br/> <b>NO</b> = If primary outcomes were not explained in reproducible detail, or validity and reliability not proven/reported.</p>                                                                                                                                                                                                               |
| 13. Was there adequate adjustment for confounding in the analyses from which the main findings were drawn?                                                  | In non-randomised studies if the effect of the main confounders (gender, age + 1 more) was not investigated <b>or</b> no adjustment was made in the final analyses the question should be answered as = <b>NO</b> .                                                                                                                                                                                                                                                                                                                                                                                                                         |

|                                                                                                                                                                |                                                                                                                                                                                                                                                                                                                                                                     |
|----------------------------------------------------------------------------------------------------------------------------------------------------------------|---------------------------------------------------------------------------------------------------------------------------------------------------------------------------------------------------------------------------------------------------------------------------------------------------------------------------------------------------------------------|
|                                                                                                                                                                | <p><b>YES</b> = If no significant difference in confounders (age, gender + 1 more) between groups stated/shown. <b>YES</b> = If adjustments were made for 1 or more confounders in the analysis.</p>                                                                                                                                                                |
| <p>14. Did the study have sufficient power to detect a clinically important effect where the probability value for a difference being due to chance &lt;5%</p> | <p><b>YES</b> = if sample size was calculated and sample size was sufficient to detect a clinically important effect where the probability value for a difference being due to chance &lt;5%.<br/> <b>NO</b> = if no sample size calculation, <b>or</b> calculation found insufficient sample size to detect clinically important effect in primary outcome(s).</p> |
